# Supplementary material
Source: PubMed Central journal article supplement (PMC4478169)

Supplemental Figure 1. MIP image taken from a time-resolved CE-MRA study of the calves acquired with  $R = R_Y \times R_Z = 5.4 \times 2.5 = 13.5$ .  $1 \text{ mm}^3$  isotropic spatial resolution. Frame time was 3.9 sec, and temporal footprint was 13.8 sec. A 16-element coil array was used.

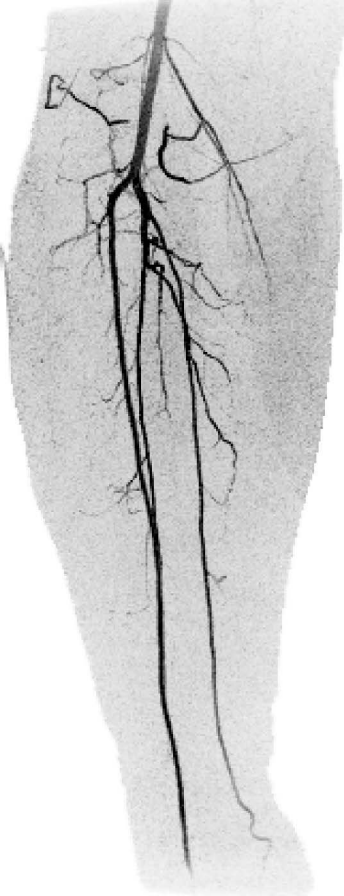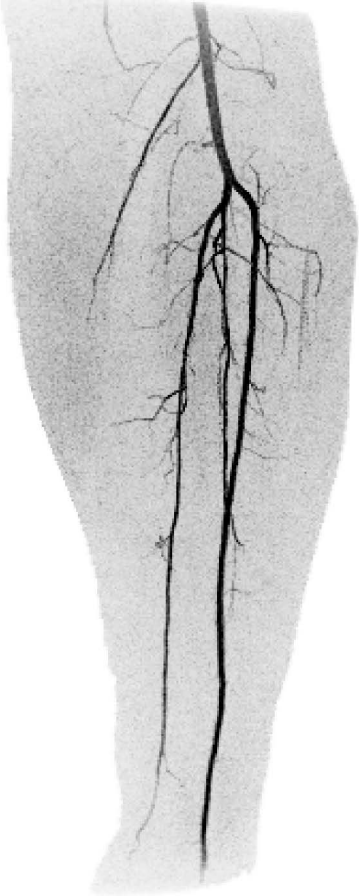

Supplement: NIHMS684950-supplement-01.pdf [file NIHMS684950-supplement-01.pdf]
